# Supplementary material for: L-Cysteine Synthase Enhanced Sulfide Biotransformation in Subtropical Marine Mangrove Sediments as Revealed by Metagenomics Analysis
Source: MDPI journal article supplement (doi:10.3390/w13213053), 2021-11-01

## Supplementary Materials

### **L-Cysteine synthase enhanced sulfide biotransformation in subtropical marine mangrove sediments as revealed by metagenomics analysis**

Shuming Mo <sup>1,†</sup>, Jinhui Li <sup>1,†</sup>, Bin Li <sup>2</sup>, Muhammad Kashif<sup>1</sup>, Shiqing Nie <sup>1</sup>, Jianping Liao <sup>3</sup>, Guijiao Su <sup>1</sup>, Qiong Jiang <sup>1</sup>, Bing Yan <sup>2 \*</sup>, and Chengjian Jiang <sup>1,2 \*</sup>

<sup>1</sup> State Key Laboratory for Conservation and Utilization of Subtropical Agro-bioresources, Guangxi Research Center for Microbial and Enzyme Engineering Technology, College of Life Science and Technology, Guangxi University, Nanning 530004, China.

<sup>2</sup> Guangxi Key Lab of Mangrove Conservation and Utilization, Guangxi Mangrove Research Center, Guangxi Academy of Sciences, Beihai 536000, China.

<sup>3</sup> School of Computer and Information Engineering, Nanning Normal University, Nanning 530299, China.

† These authors contributed equally to this work.

\*: Corresponding Author:

Tel: +86-771-3270736; Fax: +86-771-3237873

Email: jiangcj0520@vip.163.com; gxybing@tom.com (BY)

**Supplementary Table S1.** Functional gene abundances.

| Gene        | RS1    | RS2    | RS3    | NRS1   | NRS2   | NRS3   | NMS1   | NMS2   | NMS3   |
|-------------|--------|--------|--------|--------|--------|--------|--------|--------|--------|
| <i>hdrA</i> | 9296.6 | 6430.1 | 7483.2 | 10067. | 10136. | 10055. | 7450.0 | 8143.3 | 8859.1 |
|             | 3      | 6      | 0      | 70     | 89     | 02     | 7      | 9      | 3      |
| <i>atsA</i> | 5258.0 | 5077.1 | 4154.0 | 4772.8 | 4607.0 | 5284.6 | 5202.7 | 4722.9 | 4674.0 |
|             | 4      | 2      | 5      | 7      | 8      | 8      | 2      | 0      | 7      |
| <i>dmdB</i> | 3684.9 | 3260.9 | 3345.6 | 3698.1 | 4105.4 | 4236.9 | 3878.7 | 3963.0 | 4100.4 |
|             | 1      | 1      | 3      | 7      | 8      | 9      | 5      | 7      | 5      |
| <i>dmsA</i> | 2876.9 | 2386.9 | 2986.5 | 2677.0 | 2632.5 | 2982.9 | 2328.3 | 2314.5 | 2649.8 |
|             | 6      | 6      | 9      | 3      | 3      | 0      | 9      | 0      | 5      |
| <i>cysC</i> | 2387.0 | 2321.6 | 2102.7 | 2378.2 | 2384.6 | 2425.6 | 2329.9 | 2461.9 | 2378.2 |
|             | 2      | 5      | 4      | 6      | 4      | 2      | 4      | 0      | 8      |
| <i>hdrD</i> | 1932.8 | 1342.2 | 1715.2 | 1950.0 | 1954.9 | 1949.6 | 1357.4 | 1413.9 | 1665.7 |
|             | 5      | 8      | 0      | 9      | 8      | 7      | 7      | 8      | 3      |
| <i>tusA</i> | 1902.3 | 1793.8 | 1770.7 | 1815.2 | 1763.8 | 1988.6 | 1754.3 | 1841.0 | 1773.1 |
|             | 1      | 4      | 2      | 5      | 3      | 1      | 2      | 3      | 6      |
| <i>cysE</i> | 1842.0 | 1918.5 | 1862.4 | 1871.1 | 1915.6 | 1908.4 | 1852.1 | 1956.5 | 1860.3 |
|             | 7      | 5      | 9      | 6      | 3      | 3      | 3      | 8      | 7      |
| <i>ttrB</i> | 1415.7 | 1398.9 | 1552.7 | 1375.8 | 1433.0 | 1508.6 | 1145.2 | 1213.5 | 1307.0 |
|             | 9      | 5      | 7      | 1      | 7      | 7      | 3      | 0      | 0      |
| <i>cysK</i> | 1297.3 | 1338.9 | 1181.0 | 1148.5 | 1320.6 | 1392.0 | 1562.5 | 1589.6 | 1320.4 |
|             | 9      | 1      | 8      | 8      | 7      | 6      | 4      | 2      | 2      |
| <i>slcC</i> | 1254.0 | 1157.8 | 1056.3 | 1286.8 | 1262.9 | 1308.3 | 1436.1 | 1388.1 | 1262.0 |
|             | 5      | 9      | 6      | 0      | 9      | 8      | 2      | 7      | 3      |
| <i>xsc</i>  | 1253.7 | 1195.0 | 1176.9 | 1263.6 | 1250.1 | 1277.7 | 1247.2 | 1428.7 | 1159.3 |
|             | 7      | 0      | 4      | 5      | 0      | 9      | 4      | 2      | 5      |
| <i>sat</i>  | 1221.6 | 1185.4 | 1302.4 | 1140.4 | 1121.9 | 1279.8 | 1369.7 | 1288.0 | 1303.2 |
|             | 5      | 2      | 3      | 6      | 7      | 4      | 5      | 9      | 9      |
| <i>cysN</i> | 1166.1 | 1306.2 | 1104.0 | 1222.9 | 1349.4 | 1225.3 | 1372.9 | 1491.6 | 1302.4 |
|             | 0      | 4      | 3      | 3      | 5      | 1      | 6      | 6      | 6      |
| <i>cysQ</i> | 1128.3 | 1180.1 | 1019.2 | 997.92 | 1036.1 | 1200.0 | 1095.6 | 1059.7 | 1068.2 |
|             | 3      | 5      | 5      |        | 9      | 5      | 5      | 3      | 7      |
| <i>glpE</i> | 973.60 | 963.74 | 824.45 | 978.54 | 920.98 | 983.41 | 951.43 | 956.04 | 886.82 |
| <i>ssuD</i> | 965.61 | 1050.5 | 847.14 | 846.68 | 740.63 | 1018.3 | 1130.6 | 1152.4 | 839.07 |
|             |        | 1      |        |        |        | 4      | 0      | 4      |        |
| <i>cysJ</i> | 802.26 | 802.75 | 831.86 | 742.84 | 805.82 | 794.77 | 783.59 | 842.88 | 818.14 |

|              |        |        |        |        |        |        |        |        |        |
|--------------|--------|--------|--------|--------|--------|--------|--------|--------|--------|
| <i>tauD</i>  | 796.79 | 837.99 | 799.26 | 692.15 | 796.44 | 841.20 | 881.77 | 837.33 | 843.33 |
| <i>nrnA</i>  | 781.83 | 610.89 | 799.94 | 820.70 | 956.30 | 801.13 | 628.13 | 695.50 | 836.54 |
| <i>dsrK</i>  | 774.30 | 708.07 | 616.90 | 809.42 | 845.70 | 942.23 | 573.50 | 754.62 | 767.06 |
| <i>metB</i>  | 747.04 | 659.75 | 613.80 | 714.15 | 833.35 | 695.00 | 1030.5 | 947.59 | 802.95 |
|              |        |        |        |        |        |        | 0      |        |        |
| <i>aprA</i>  | 722.93 | 600.10 | 540.46 | 737.23 | 583.28 | 743.12 | 437.70 | 476.07 | 595.25 |
| <i>ddhA</i>  | 670.98 | 506.85 | 742.03 | 710.56 | 724.91 | 754.57 | 513.70 | 593.00 | 609.93 |
| <i>pspE</i>  | 597.58 | 625.72 | 446.81 | 516.48 | 548.51 | 524.83 | 468.20 | 488.23 | 604.07 |
| <i>dmdC</i>  | 543.99 | 432.74 | 450.12 | 424.09 | 557.01 | 499.09 | 557.84 | 524.47 | 530.16 |
| <i>dmdA</i>  | 535.69 | 505.59 | 425.93 | 462.19 | 627.46 | 536.04 | 886.58 | 803.75 | 668.32 |
| <i>cysH</i>  | 530.74 | 429.74 | 504.71 | 477.38 | 539.81 | 521.36 | 507.08 | 463.13 | 443.30 |
| <i>hdrC</i>  | 514.34 | 369.63 | 386.27 | 633.34 | 579.95 | 476.12 | 360.05 | 419.71 | 475.83 |
| <i>dsrP</i>  | 448.29 | 367.68 | 526.30 | 473.36 | 428.09 | 419.95 | 266.21 | 338.10 | 372.60 |
| <i>sir</i>   | 421.90 | 588.58 | 392.43 | 357.97 | 373.20 | 411.36 | 381.04 | 390.37 | 423.38 |
| <i>fccB</i>  | 400.68 | 458.92 | 398.21 | 303.43 | 358.44 | 416.68 | 370.11 | 354.17 | 332.34 |
| <i>asrB</i>  | 390.76 | 323.98 | 373.38 | 512.60 | 474.48 | 469.77 | 361.94 | 337.26 | 386.63 |
| <i>otr</i>   | 387.53 | 282.05 | 233.13 | 354.24 | 371.34 | 442.30 | 305.91 | 352.62 | 367.31 |
| <i>msmA</i>  | 385.34 | 416.92 | 319.81 | 274.15 | 261.10 | 301.52 | 426.14 | 358.34 | 309.67 |
| <i>soxB</i>  | 381.57 | 509.57 | 374.19 | 321.80 | 285.65 | 345.65 | 400.48 | 405.12 | 387.75 |
| <i>psrA</i>  | 366.84 | 275.21 | 386.80 | 426.07 | 382.77 | 376.53 | 274.39 | 327.96 | 321.33 |
| <i>dsrB</i>  | 362.75 | 254.47 | 276.02 | 372.36 | 359.21 | 367.98 | 202.01 | 265.93 | 331.01 |
| <i>dmdD</i>  | 356.56 | 238.42 | 224.75 | 410.30 | 464.24 | 379.21 | 378.55 | 406.95 | 414.61 |
| <i>ssuC</i>  | 350.29 | 413.97 | 427.90 | 290.24 | 359.36 | 385.93 | 422.94 | 458.47 | 398.09 |
| <i>SUOX</i>  | 314.18 | 314.19 | 267.07 | 419.92 | 287.81 | 276.19 | 329.20 | 249.23 | 317.24 |
| <i>dsrF</i>  | 313.35 | 446.91 | 258.78 | 285.03 | 228.77 | 296.94 | 344.99 | 328.43 | 319.36 |
| <i>ssuA</i>  | 312.98 | 334.83 | 364.51 | 349.98 | 321.84 | 330.15 | 334.90 | 344.93 | 348.01 |
| <i>sseA</i>  | 299.09 | 433.70 | 296.41 | 211.87 | 291.57 | 263.71 | 356.45 | 303.53 | 261.23 |
| <i>dsrM</i>  | 293.80 | 240.93 | 240.35 | 286.19 | 226.13 | 260.56 | 171.73 | 151.50 | 189.07 |
| <i>asrC</i>  | 291.07 | 193.71 | 391.66 | 334.32 | 343.92 | 340.15 | 173.52 | 227.78 | 308.13 |
| <i>MET3</i>  | 287.25 | 316.40 | 196.65 | 288.70 | 270.44 | 304.70 | 302.71 | 320.92 | 281.24 |
| <i>dsrA</i>  | 285.79 | 291.53 | 313.44 | 304.72 | 242.39 | 307.60 | 203.73 | 244.25 | 258.19 |
| <i>hdrE</i>  | 254.30 | 99.61  | 168.96 | 305.08 | 278.47 | 248.63 | 155.53 | 157.86 | 234.37 |
| <i>ETHE1</i> | 230.98 | 274.49 | 200.26 | 194.76 | 211.52 | 256.70 | 213.49 | 228.21 | 223.16 |
| <i>sqr</i>   | 230.02 | 184.73 | 131.45 | 196.43 | 171.66 | 187.36 | 227.76 | 228.81 | 205.87 |
| <i>dsrN</i>  | 226.69 | 191.23 | 304.58 | 287.16 | 297.03 | 226.27 | 184.37 | 211.27 | 293.07 |
| <i>sorA</i>  | 214.20 | 176.83 | 143.40 | 175.01 | 236.07 | 235.99 | 284.99 | 277.67 | 257.49 |
| <i>asrA</i>  | 208.76 | 144.89 | 162.31 | 232.07 | 176.79 | 159.12 | 130.46 | 181.14 | 164.60 |
| <i>dddD</i>  | 198.50 | 190.67 | 167.86 | 236.52 | 219.00 | 225.97 | 202.46 | 196.29 | 165.34 |
| <i>MET10</i> | 195.03 | 194.54 | 165.19 | 161.44 | 144.56 | 167.12 | 145.32 | 170.01 | 156.72 |

|              |        |        |        |        |        |        |        |        |        |
|--------------|--------|--------|--------|--------|--------|--------|--------|--------|--------|
| <i>cysI</i>  | 191.07 | 148.69 | 152.34 | 123.31 | 155.55 | 147.63 | 179.66 | 145.82 | 158.39 |
| <i>fccA</i>  | 186.13 | 454.07 | 218.92 | 129.96 | 144.30 | 161.27 | 237.92 | 201.90 | 231.41 |
| <i>mtsA</i>  | 185.64 | 132.08 | 107.51 | 148.83 | 166.68 | 175.87 | 169.86 | 141.74 | 205.42 |
| <i>hdrB</i>  | 182.37 | 161.43 | 134.99 | 138.21 | 130.24 | 153.37 | 227.38 | 193.25 | 209.72 |
| <i>cysNC</i> | 181.77 | 330.38 | 162.21 | 160.30 | 204.10 | 208.27 | 271.07 | 258.53 | 222.76 |
| <i>ttrA</i>  | 178.79 | 123.58 | 131.96 | 189.50 | 207.93 | 176.95 | 256.09 | 220.22 | 201.31 |
| <i>mtsB</i>  | 173.87 | 144.13 | 224.14 | 206.21 | 201.41 | 274.83 | 123.15 | 159.09 | 173.75 |
| <i>cuyA</i>  | 164.15 | 203.07 | 92.64  | 133.69 | 189.16 | 162.83 | 252.26 | 273.43 | 223.04 |
| <i>comE</i>  | 160.21 | 183.63 | 195.43 | 160.07 | 174.76 | 175.08 | 270.35 | 238.57 | 199.25 |
| <i>hydA</i>  | 146.08 | 110.38 | 112.05 | 193.37 | 157.30 | 195.59 | 123.30 | 133.11 | 172.33 |
| <i>npsr</i>  | 144.52 | 164.93 | 162.11 | 165.35 | 150.09 | 188.84 | 138.50 | 134.93 | 124.18 |
| <i>tsdB</i>  | 144.10 | 220.79 | 135.96 | 89.62  | 93.25  | 112.26 | 135.64 | 116.22 | 167.33 |
| <i>phsB</i>  | 142.79 | 111.70 | 112.37 | 182.76 | 193.88 | 147.15 | 99.89  | 87.66  | 98.60  |
| <i>dddP</i>  | 136.56 | 122.11 | 194.17 | 194.60 | 152.71 | 188.52 | 179.97 | 150.85 | 175.17 |
| <i>phsA</i>  | 136.25 | 71.81  | 79.09  | 161.93 | 205.39 | 208.91 | 185.60 | 220.75 | 225.10 |
| <i>cysD</i>  | 133.96 | 185.17 | 126.32 | 152.22 | 153.92 | 136.44 | 208.69 | 205.09 | 175.84 |
| <i>aprB</i>  | 133.65 | 170.23 | 104.25 | 151.58 | 156.94 | 146.11 | 117.16 | 73.23  | 168.78 |
| <i>dsrO</i>  | 132.90 | 146.85 | 134.83 | 138.42 | 98.31  | 153.04 | 97.05  | 123.27 | 137.41 |
| <i>dsoF</i>  | 124.97 | 114.51 | 85.02  | 79.43  | 80.85  | 105.07 | 75.21  | 98.10  | 87.90  |
| <i>dmsB</i>  | 124.80 | 142.83 | 127.11 | 119.74 | 183.34 | 157.34 | 102.14 | 145.29 | 153.66 |
| <i>MET5</i>  | 122.56 | 155.75 | 139.11 | 152.85 | 113.40 | 112.68 | 187.76 | 153.14 | 195.94 |
| <i>hydD</i>  | 118.71 | 112.64 | 68.45  | 87.91  | 91.61  | 98.46  | 71.96  | 59.02  | 47.10  |
| <i>dsrC</i>  | 111.58 | 86.32  | 111.19 | 105.34 | 78.18  | 134.71 | 93.25  | 72.74  | 86.25  |
| <i>mccB</i>  | 111.19 | 127.99 | 86.13  | 124.94 | 153.14 | 88.14  | 140.82 | 152.67 | 146.61 |
| <i>MET17</i> | 110.93 | 100.28 | 101.86 | 126.35 | 153.23 | 141.32 | 132.74 | 91.19  | 92.88  |
| <i>suyB</i>  | 109.44 | 99.17  | 102.37 | 124.40 | 152.73 | 139.52 | 181.18 | 146.92 | 164.44 |
| <i>soxY</i>  | 104.26 | 138.76 | 84.32  | 108.96 | 78.59  | 94.57  | 135.81 | 156.76 | 128.85 |
| <i>phsC</i>  | 103.56 | 95.31  | 63.87  | 82.19  | 84.49  | 102.17 | 84.89  | 82.12  | 68.94  |
| <i>soxA</i>  | 96.85  | 154.81 | 92.42  | 113.22 | 115.16 | 146.65 | 151.86 | 141.05 | 132.13 |
| <i>shyC</i>  | 91.73  | 83.35  | 53.29  | 56.40  | 62.31  | 70.82  | 49.13  | 57.76  | 51.89  |
| <i>aprM</i>  | 91.18  | 138.60 | 45.36  | 48.10  | 70.42  | 45.28  | 75.97  | 69.40  | 68.51  |
| <i>mddA</i>  | 81.16  | 80.97  | 58.49  | 90.01  | 92.62  | 83.80  | 88.80  | 106.80 | 117.81 |
| <i>sorB</i>  | 77.45  | 153.46 | 92.91  | 58.53  | 78.15  | 58.18  | 165.92 | 111.82 | 103.60 |
| <i>dsrJ</i>  | 75.44  | 108.19 | 120.37 | 89.99  | 113.16 | 90.57  | 63.88  | 81.42  | 97.84  |
| <i>soxX</i>  | 75.08  | 71.82  | 39.30  | 91.34  | 45.70  | 68.45  | 83.87  | 74.61  | 90.08  |
| <i>soxD</i>  | 74.82  | 94.77  | 78.58  | 75.74  | 81.68  | 75.55  | 116.79 | 118.55 | 57.80  |
| <i>sdo</i>   | 74.41  | 125.96 | 103.32 | 121.49 | 117.57 | 119.01 | 174.36 | 129.40 | 198.65 |
| <i>psrC</i>  | 68.01  | 25.27  | 41.18  | 33.26  | 21.85  | 61.57  | 43.52  | 55.05  | 62.94  |
| <i>apt</i>   | 67.39  | 121.13 | 60.40  | 42.95  | 63.74  | 77.34  | 66.09  | 49.72  | 86.18  |

|               |       |        |        |        |        |       |       |        |       |
|---------------|-------|--------|--------|--------|--------|-------|-------|--------|-------|
| <i>soxV</i>   | 64.83 | 77.82  | 99.09  | 60.76  | 48.68  | 41.70 | 90.07 | 81.74  | 50.91 |
| <i>ssuE</i>   | 62.03 | 99.99  | 108.39 | 101.55 | 144.25 | 80.10 | 67.43 | 118.44 | 60.01 |
| <i>ttrC</i>   | 58.88 | 65.75  | 78.13  | 91.55  | 80.42  | 73.44 | 86.37 | 108.43 | 83.22 |
| <i>soxI</i>   | 55.06 | 81.97  | 24.69  | 63.54  | 51.87  | 61.78 | 48.56 | 67.85  | 59.22 |
| <i>suyA</i>   | 52.32 | 20.23  | 4.39   | 36.58  | 41.37  | 51.76 | 47.86 | 47.55  | 26.08 |
| <i>soxZ</i>   | 51.24 | 102.52 | 65.46  | 55.18  | 91.98  | 55.65 | 89.09 | 60.14  | 75.27 |
| <i>dmsC</i>   | 50.96 | 57.64  | 28.00  | 51.65  | 76.64  | 59.50 | 58.13 | 48.51  | 73.07 |
| <i>SoeA</i>   | 48.96 | 84.16  | 27.49  | 22.48  | 46.89  | 47.66 | 28.22 | 52.74  | 48.55 |
| <i>comC</i>   | 48.38 | 26.20  | 42.56  | 73.45  | 35.60  | 56.08 | 33.29 | 53.58  | 28.04 |
| <i>MET22</i>  | 44.58 | 96.17  | 37.28  | 46.32  | 29.29  | 44.92 | 43.42 | 30.61  | 50.65 |
| <i>slcD</i>   | 37.34 | 39.58  | 42.32  | 44.75  | 33.07  | 28.44 | 75.77 | 57.41  | 48.37 |
| <i>msuD</i>   | 35.87 | 35.38  | 16.70  | 26.28  | 51.75  | 28.06 | 42.74 | 29.50  | 29.61 |
| <i>tmoC</i>   | 34.57 | 17.25  | 5.63   | 9.38   | 45.77  | 7.69  | 8.74  | 15.25  | 41.60 |
| <i>comD</i>   | 34.28 | 22.88  | 16.53  | 37.90  | 44.57  | 40.72 | 39.54 | 62.48  | 25.30 |
| <i>sreA</i>   | 33.19 | 6.73   | 51.47  | 31.32  | 16.04  | 23.14 | 15.12 | 14.98  | 31.60 |
| <i>SoxC</i>   | 32.27 | 57.85  | 37.90  | 44.27  | 64.80  | 50.44 | 68.15 | 70.87  | 51.45 |
| <i>soeC</i>   | 30.81 | 38.05  | 17.17  | 8.55   | 18.54  | 29.90 | 19.90 | 16.05  | 12.29 |
| <i>SoeB</i>   | 29.66 | 3.49   | 6.90   | 1.84   | 16.77  | 8.29  | 4.20  | 3.86   | 9.47  |
| <i>dsrE</i>   | 27.86 | 29.52  | 33.40  | 38.53  | 18.92  | 22.78 | 25.82 | 42.13  | 19.78 |
| <i>psrB</i>   | 24.02 | 18.72  | 20.35  | 30.35  | 22.95  | 12.53 | 29.62 | 25.79  | 22.10 |
| <i>hydG</i>   | 23.67 | 43.90  | 23.81  | 19.32  | 11.89  | 49.20 | 20.80 | 45.25  | 42.61 |
| <i>SELENB</i> | 19.55 | 11.70  | 15.59  | 6.72   | 8.81   | 17.63 | 22.12 | 38.25  | 11.35 |
| <i>PI</i>     |       |        |        |        |        |       |       |        |       |
| <i>Tmm</i>    | 18.76 | 13.41  | 5.04   | 7.00   | 14.83  | 13.94 | 28.38 | 18.60  | 29.12 |
| <i>doxD</i>   | 17.87 | 4.46   | 6.98   | 18.96  | 16.20  | 20.89 | 25.13 | 19.49  | 21.91 |
| <i>rhd</i>    | 14.54 | 0.00   | 4.77   | 15.72  | 0.00   | 15.79 | 2.13  | 6.58   | 18.15 |
| <i>soxW</i>   | 13.88 | 2.72   | 7.58   | 15.98  | 20.49  | 22.51 | 16.79 | 14.79  | 27.73 |
| <i>fsr</i>    | 13.86 | 5.04   | 6.90   | 13.60  | 8.85   | 27.28 | 2.96  | 4.15   | 15.94 |
| <i>dsrH</i>   | 13.22 | 36.24  | 28.33  | 10.40  | 10.73  | 19.56 | 37.33 | 12.42  | 7.12  |
| <i>dddQ</i>   | 9.72  | 4.41   | 0.00   | 5.45   | 5.78   | 7.62  | 7.04  | 1.22   | 6.41  |
| <i>HINT4</i>  | 9.60  | 20.09  | 14.98  | 9.46   | 5.44   | 29.13 | 2.20  | 10.66  | 6.36  |
| <i>dsoD</i>   | 9.44  | 0.60   | 7.01   | 3.51   | 4.67   | 8.14  | 4.57  | 6.91   | 14.49 |
| <i>tmoF</i>   | 9.33  | 21.89  | 11.85  | 20.35  | 14.48  | 11.55 | 20.37 | 26.07  | 47.37 |
| <i>SOX</i>    | 8.60  | 0.00   | 0.00   | 0.00   | 9.68   | 5.35  | 0.00  | 3.89   | 11.96 |
| <i>tsdA</i>   | 8.24  | 33.85  | 20.09  | 22.66  | 2.20   | 17.69 | 28.10 | 24.60  | 21.95 |
| <i>dmoB</i>   | 7.53  | 27.62  | 4.70   | 28.85  | 12.80  | 10.32 | 19.53 | 6.62   | 14.88 |
| <i>dmoA</i>   | 6.86  | 0.00   | 0.00   | 0.00   | 0.00   | 0.00  | 0.00  | 4.27   | 0.00  |
| <i>ddhB</i>   | 6.86  | 13.72  | 3.13   | 12.14  | 19.51  | 24.56 | 28.82 | 28.26  | 29.11 |
| <i>sirA</i>   | 6.83  | 9.51   | 7.85   | 4.79   | 11.17  | 3.39  | 12.10 | 9.19   | 7.62  |

|               |      |       |      |       |      |       |       |       |      |
|---------------|------|-------|------|-------|------|-------|-------|-------|------|
| <i>dddL</i>   | 6.12 | 1.75  | 9.51 | 0.00  | 2.24 | 0.00  | 12.45 | 10.99 | 0.00 |
| <i>sor</i>    | 3.36 | 0.00  | 0.00 | 3.90  | 6.81 | 4.18  | 11.92 | 4.06  | 7.57 |
| <i>SAL</i>    | 3.18 | 0.00  | 0.00 | 4.69  | 0.00 | 0.00  | 0.00  | 0.00  | 0.00 |
| <i>shyB</i>   | 3.15 | 1.20  | 1.57 | 6.58  | 3.85 | 1.62  | 0.00  | 0.98  | 2.82 |
| <i>ygaP</i>   | 3.13 | 12.99 | 1.39 | 0.00  | 7.29 | 0.00  | 2.56  | 0.00  | 0.00 |
| <i>SQOR</i>   | 2.39 | 0.91  | 2.82 | 0.78  | 0.00 | 0.73  | 1.48  | 0.00  | 2.14 |
| <i>dddW</i>   | 2.05 | 9.20  | 0.00 | 5.90  | 8.96 | 29.88 | 0.00  | 1.63  | 0.00 |
| <i>qmoA</i>   | 1.24 | 0.00  | 1.96 | 1.22  | 3.02 | 4.04  | 0.00  | 2.32  | 0.00 |
| <i>ddhC</i>   | 1.07 | 3.66  | 0.95 | 0.00  | 1.24 | 0.00  | 1.42  | 4.29  | 0.00 |
| <i>soxS</i>   | 0.00 | 0.00  | 0.00 | 10.90 | 4.49 | 1.69  | 1.72  | 0.00  | 0.00 |
| <i>dsoB</i>   | 0.00 | 5.07  | 2.25 | 4.15  | 2.91 | 5.60  | 5.50  | 4.93  | 0.76 |
| <i>hdrF</i>   | 0.00 | 0.00  | 6.79 | 1.88  | 0.00 | 2.89  | 8.37  | 0.00  | 2.01 |
| <i>TST</i>    | 0.00 | 0.00  | 0.00 | 0.00  | 5.63 | 0.00  | 0.00  | 8.83  | 5.09 |
| <i>MPST</i>   | 0.00 | 2.14  | 1.66 | 0.00  | 0.00 | 6.86  | 0.00  | 0.00  | 3.36 |
| <i>dsrD</i>   | 0.00 | 0.00  | 0.00 | 19.08 | 0.00 | 0.00  | 0.00  | 0.00  | 0.00 |
| <i>APA1_2</i> | 0.00 | 0.00  | 1.70 | 0.00  | 4.75 | 0.00  | 8.63  | 8.16  | 2.10 |
| <i>sorT</i>   | 0.00 | 0.00  | 1.57 | 0.00  | 0.00 | 1.46  | 5.96  | 1.65  | 4.75 |

---

**Supplementary Table S2.** Impact of sediment properties on dissimilating sulfate reduction gene families.

| Gene         | PH      | salinity | ORP     | AS     | NO <sub>3</sub> <sup>-</sup> | NH <sub>4</sub> <sup>+</sup> | Fe      | TOC    | TN     | TP    | Sulfides |
|--------------|---------|----------|---------|--------|------------------------------|------------------------------|---------|--------|--------|-------|----------|
| <i>sat</i>   | 0.15    | 0.13     | 0.30    | -0.56  | 0.55                         | 0.56                         | -0.45   | -0.16  | -0.24  | -0.01 | -0.59    |
| <i>cysN</i>  | 0.76*   | 0.78*    | 0.24    | -0.68* | 0.06                         | 0.30                         | -0.82** | -0.74* | -0.67* | -0.44 | -0.09    |
| <i>cysQ</i>  | 0.17    | -0.25    | 0.05    | -0.14  | 0.48                         | 0.42                         | 0.03    | 0.22   | 0.23   | 0.12  | 0.13     |
| <i>cysJ</i>  | -0.24   | 0.21     | 0.68*   | -0.07  | -0.28                        | -0.10                        | -0.37   | 0.09   | 0.14   | 0.47  | -0.42    |
| <i>nrnA</i>  | -0.47   | -0.07    | -0.27   | 0.18   | -0.42                        | -0.72*                       | 0.32    | -0.10  | -0.12  | -0.25 | -0.26    |
| <i>dsrK</i>  | 0.00    | -0.20    | -0.55   | -0.08  | -0.18                        | -0.55                        | 0.36    | -0.11  | -0.13  | -0.34 | 0.10     |
| <i>aprA</i>  | -0.24   | -0.71*   | -0.59   | 0.36   | -0.17                        | -0.53                        | 0.75*   | 0.32   | 0.29   | -0.06 | 0.34     |
| <i>cysH</i>  | -0.56   | 0.24     | -0.28   | 0.03   | 0.33                         | 0.02                         | 0.24    | 0.15   | 0.03   | -0.25 | -0.58    |
| <i>dsrP</i>  | -0.83** | -0.58    | -0.34   | .767*  | -0.48                        | -0.72*                       | 0.86**  | 0.66   | 0.63   | 0.45  | 0.16     |
| <i>sir</i>   | 0.15    | -0.37    | 0.40    | 0.34   | -0.08                        | 0.20                         | 0.03    | 0.38   | 0.50   | 0.57  | 0.62     |
| <i>asrB</i>  | -0.18   | -0.14    | -0.81** | 0.07   | -0.02                        | -0.44                        | 0.53    | -0.11  | -0.19  | -0.51 | 0.06     |
| <i>dsrB</i>  | -0.29   | -0.42    | -0.51   | 0.22   | -0.39                        | -0.76*                       | 0.56    | 0.04   | 0.02   | -0.25 | 0.05     |
| <i>dsrM</i>  | -0.52   | -0.69*   | -0.48   | 0.68*  | -0.15                        | -0.40                        | 0.88**  | 0.63   | 0.60   | 0.21  | 0.39     |
| <i>asrC</i>  | -0.74*  | -0.41    | -0.39   | 0.43   | -0.36                        | -0.72*                       | 0.67    | 0.33   | 0.26   | 0.13  | -0.15    |
| <i>MET3</i>  | 0.84**  | 0.25     | -0.09   | -0.56  | 0.24                         | 0.31                         | -0.41   | -0.49  | -0.44  | -0.47 | 0.24     |
| <i>dsrA</i>  | -0.56   | -0.85**  | -0.43   | 0.69*  | -0.30                        | -0.54                        | 0.92**  | 0.76*  | 0.74*  | 0.57  | 0.48     |
| <i>dsrN</i>  | -0.52   | -0.25    | -0.16   | 0.38   | -0.57                        | -0.74*                       | 0.37    | 0.04   | 0.04   | 0.04  | -0.08    |
| <i>asrA</i>  | -0.14   | -0.25    | -0.44   | 0.29   | -0.57                        | -0.74*                       | 0.45    | 0.04   | 0.03   | -0.17 | 0.19     |
| <i>cysI</i>  | -0.10   | 0.17     | 0.58    | -0.17  | 0.31                         | 0.42                         | -0.39   | -0.02  | -0.03  | -0.05 | -0.60    |
| <i>cysNC</i> | 0.62    | 0.30     | 0.45    | -0.29  | 0.26                         | 0.62                         | -0.57   | -0.20  | -0.09  | 0.10  | 0.30     |
| <i>cysD</i>  | 0.85**  | 0.61     | 0.37    | -0.62  | 0.21                         | 0.56                         | -0.85** | -0.64  | -0.57  | -0.30 | 0.03     |
| <i>aprB</i>  | 0.10    | -0.46    | -0.10   | 0.26   | -0.11                        | -0.17                        | 0.25    | -0.03  | 0.04   | -0.12 | 0.48     |
| <i>dsrO</i>  | -0.13   | -0.87**  | -0.28   | 0.33   | -0.19                        | -0.37                        | 0.61    | 0.49   | 0.50   | 0.45  | 0.49     |
| <i>dsrC</i>  | -0.47   | -0.62    | -0.59   | 0.20   | 0.42                         | -0.02                        | .730*   | 0.53   | 0.39   | 0.10  | -0.06    |
| <i>aprM</i>  | 0.30    | -0.02    | 0.58    | 0.22   | -0.10                        | 0.31                         | -0.27   | 0.14   | 0.28   | 0.33  | 0.48     |
| <i>dsrJ</i>  | -0.57   | -0.30    | 0.09    | 0.67   | -0.51                        | -0.48                        | 0.43    | 0.46   | 0.52   | 0.59  | 0.34     |

|              |       |       |        |       |       |       |      |       |       |       |       |
|--------------|-------|-------|--------|-------|-------|-------|------|-------|-------|-------|-------|
| <i>MET22</i> | 0.26  | -0.48 | 0.20   | 0.34  | 0.00  | 0.24  | 0.12 | 0.32  | 0.43  | 0.43  | 0.77* |
| <i>HINT4</i> | -0.25 | -0.53 | -0.39  | 0.24  | 0.18  | -0.07 | 0.59 | 0.58  | 0.55  | 0.43  | 0.35  |
| <i>SAL</i>   | -0.03 | -0.37 | -0.48  | 0.31  | -0.27 | -0.40 | 0.49 | 0.11  | 0.09  | -0.19 | 0.32  |
| <i>qmoA</i>  | -0.44 | 0.13  | -0.52  | -0.03 | 0.06  | -0.34 | 0.39 | 0.17  | 0.08  | -0.08 | -0.27 |
| <i>dsrD</i>  | 0.15  | -0.25 | -.690* | 0.20  | -0.21 | -0.34 | 0.45 | -0.06 | -0.08 | -0.27 | 0.51  |

---

\* p < 0.05, \*\* p < 0.01.



**Supplementary Table S3.** Sediment properties in mangrove samples and nonmangrove samples.

| Properties                           | MS (mean) | MS (std) | NMS (mean) | NMS (std) | p-values | Mean (all samples) |
|--------------------------------------|-----------|----------|------------|-----------|----------|--------------------|
| pH                                   | 6.76      | 0.17     | 7.03       | 0.02      | 0.049    | 6.89               |
| Salinity (ppt)                       | 29.17     | 0.37     | 29.67      | 0.47      | 0.170    | 29.42              |
| ORP                                  | -207.83   | 81.85    | -141.67    | 23.23     | 0.265    | -174.75            |
| AS (mg/kg)                           | 2301.95   | 376.26   | 1383.66    | 130.34    | 0.008    | 1842.81            |
| NO <sub>3</sub> <sup>-</sup> (mg/kg) | 1.18      | 0.82     | 1.60       | 1.58      | 0.664    | 1.39               |
| NH <sub>4</sub> <sup>+</sup> (mg/kg) | 15.09     | 3.39     | 20.00      | 9.01      | 0.334    | 17.55              |
| Fe (mg/kg)                           | 96.11     | 12.52    | 54.20      | 4.25      | 0.002    | 75.16              |
| TOC (mg/g)                           | 11.62     | 3.73     | 3.93       | 1.07      | 0.018    | 7.78               |
| TN (mg/g)                            | 0.77      | 0.26     | 0.26       | 0.06      | 0.021    | 0.52               |
| TP (mg/g)                            | 0.15      | 0.06     | 0.10       | 0.02      | 0.272    | 0.13               |
| Sulfides (mg/g)                      | 0.09      | 0.05     | 0.05       | 0.01      | 0.230    | 0.07               |

Std: standard deviation; p-values: Student's t test of p-values.

**Supplementary Table S4.** Sediment properties in rhizosphere samples and nonrhizosphere samples.

| Properties                           | RS (mean) | RS (std) | NRS (mean) | NRS (std) | p-values |
|--------------------------------------|-----------|----------|------------|-----------|----------|
| pH                                   | 6.69      | 0.21     | 6.82       | 0.08      | 0.476    |
| Salinity (ppt)                       | 29.00     | 0.00     | 29.33      | 0.47      | 0.374    |
| ORP                                  | -142.33   | 13.91    | -273.33    | 68.01     | 0.056    |
| AS (mg/kg)                           | 2583.36   | 188.85   | 2020.55    | 298.51    | 0.087    |
| NO <sub>3</sub> <sup>-</sup> (mg/kg) | 0.95      | 0.08     | 1.42       | 1.11      | 0.582    |
| NH <sub>4</sub> <sup>+</sup> (mg/kg) | 16.37     | 3.19     | 13.81      | 3.10      | 0.461    |
| Fe (mg/kg)                           | 94.74     | 8.83     | 97.48      | 15.22     | 0.836    |
| TOC (mg/g)                           | 14.78     | 2.08     | 8.45       | 1.85      | 0.032    |
| TN (mg/g)                            | 1.01      | 0.12     | 0.53       | 0.07      | 0.008    |
| TP (mg/g)                            | 0.21      | 0.04     | 0.10       | 0.01      | 0.024    |
| Sulfides (mg/g)                      | 0.09      | 0.06     | 0.09       | 0.04      | 0.901    |

Std: standard deviation; p-values: Student's t test of p-values.

**Supplementary Table S5.** Partial Mantel test to evaluate the relative importance of sediments variables in determining microbial communities and the distribution of sulfur genes in subtropical mangrove ecosystem.

|                              | Functional genes |                 | microorganism community |                 |
|------------------------------|------------------|-----------------|-------------------------|-----------------|
|                              | <i>r</i> M       | <i>P</i> -value | <i>r</i> M              | <i>P</i> -value |
| TP                           | 0.632            | 0.008           | 0.577                   | 0.007           |
| TN                           | 0.519            | 0.011           | 0.492                   | 0.013           |
| AS                           | 0.440            | 0.016           | 0.409                   | 0.019           |
| TOC                          | 0.384            | 0.032           | 0.448                   | 0.026           |
| PH                           | 0.305            | 0.113           | 0.559                   | 0.008           |
| NH <sub>4</sub> <sup>+</sup> | 0.237            | 0.210           | 0.193                   | 0.234           |
| Sulfide                      | 0.230            | 0.073           | 0.185                   | 0.224           |
| Fe                           | 0.211            | 0.104           | 0.313                   | 0.031           |
| NO <sub>3</sub> <sup>-</sup> | -0.039           | 0.446           | -0.092                  | 0.487           |
| salinity                     | -0.062           | 0.571           | -0.157                  | 0.667           |
| OPR                          | -0.062           | 0.549           | -0.157                  | 0.657           |

**Supplementary Figure S1.** The 20 dominant dissimilatory sulfate-reduction genes taxonomy order level are shown with their relative abundances.

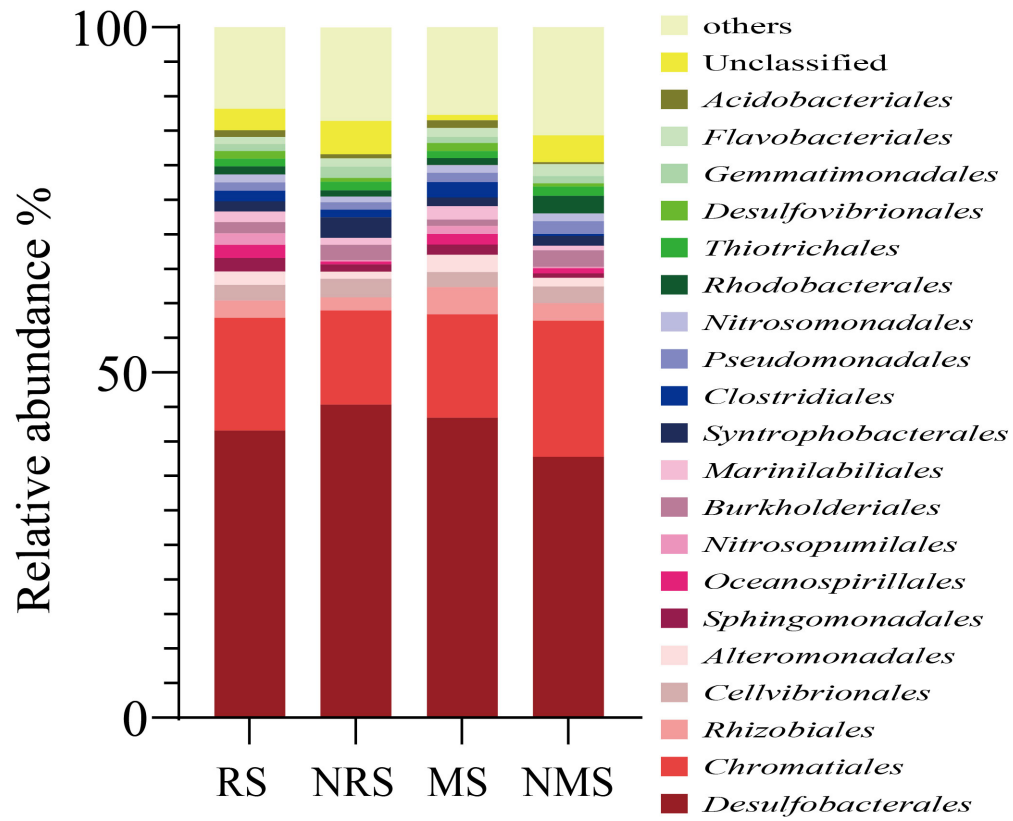

**Supplementary Figure S2.** Sediment properties. (A) TOC (mg/kg), TN (mg/kg), and TP (mg/kg). (B) Contents (mg/kg) of AS and sulfide. (C) pH, salinity, and ORP. (D) Contents (mg/g) of  $\text{NH}_4^+$ ,  $\text{NO}_3^-$ , and Fe.

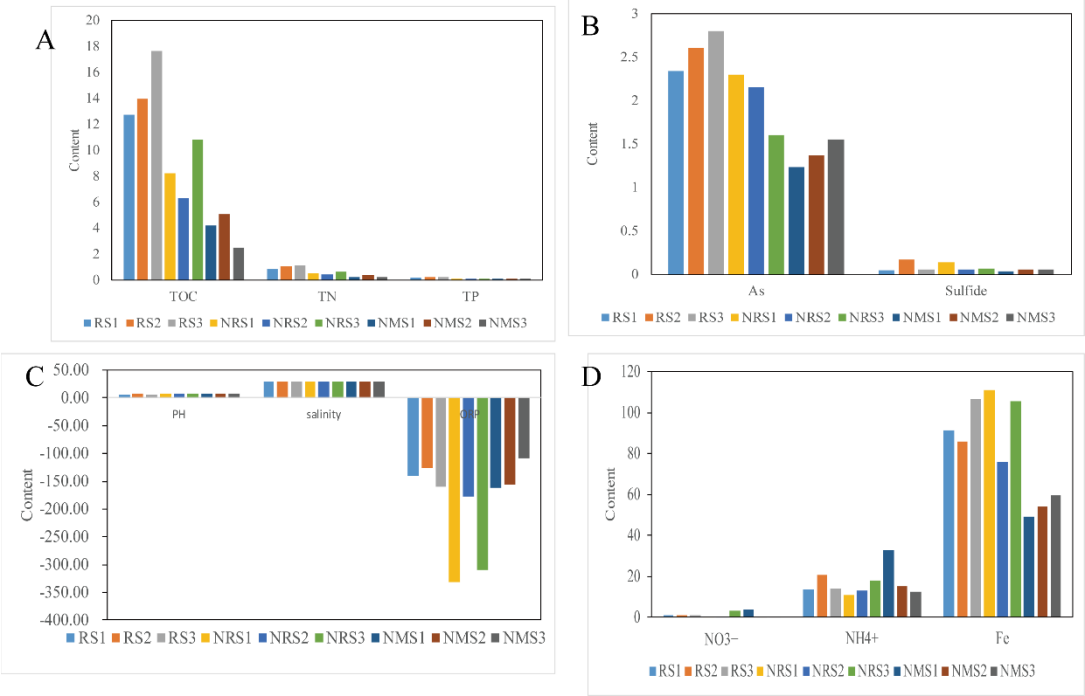

**Supplementary Figure S3.** Taxonomic classification of key functional genes retrieved from the samples. A) The key genes enriched in the MS; B) The key genes enriched in the NMS.

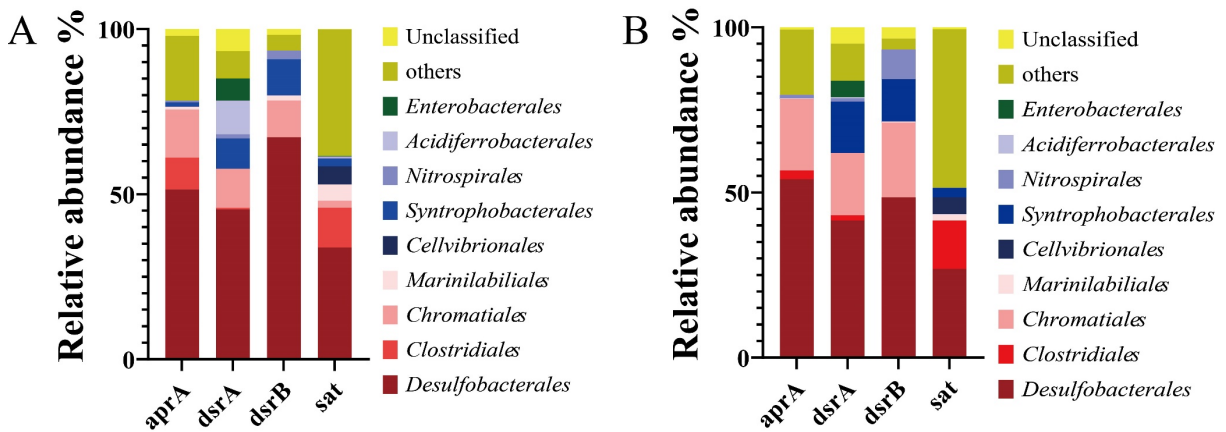

**Supplementary Figure S4.** Taxonomic classification of key functional genes retrieved from the samples. A) The key genes enriched in the RS; B) The key genes enriched in the NRS.

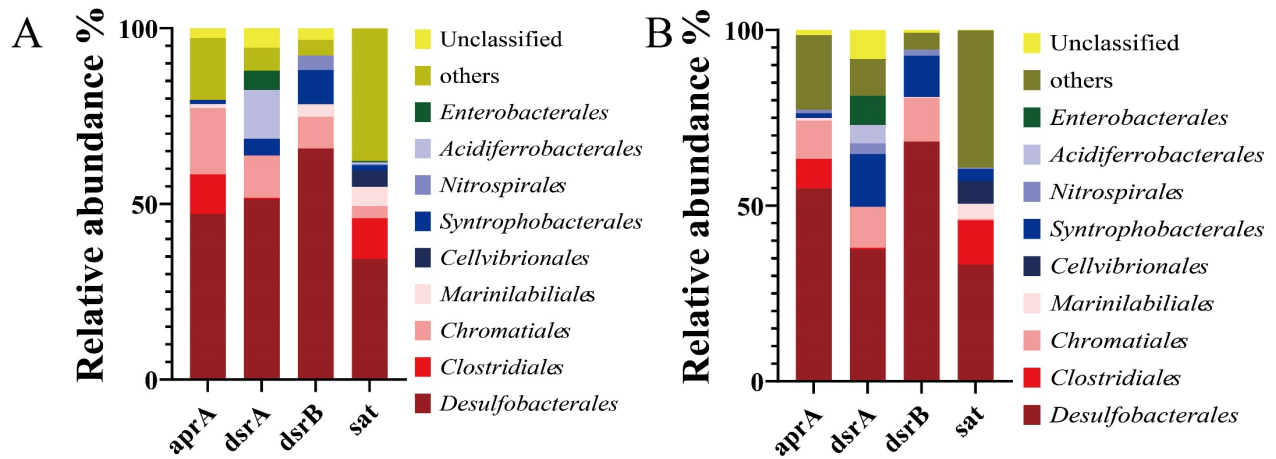

**Supplementary Figure S5.** Taxonomic classification of key functional genes retrieved from the samples. A) *cysK*; B) *cysE*; C) *sqr*.

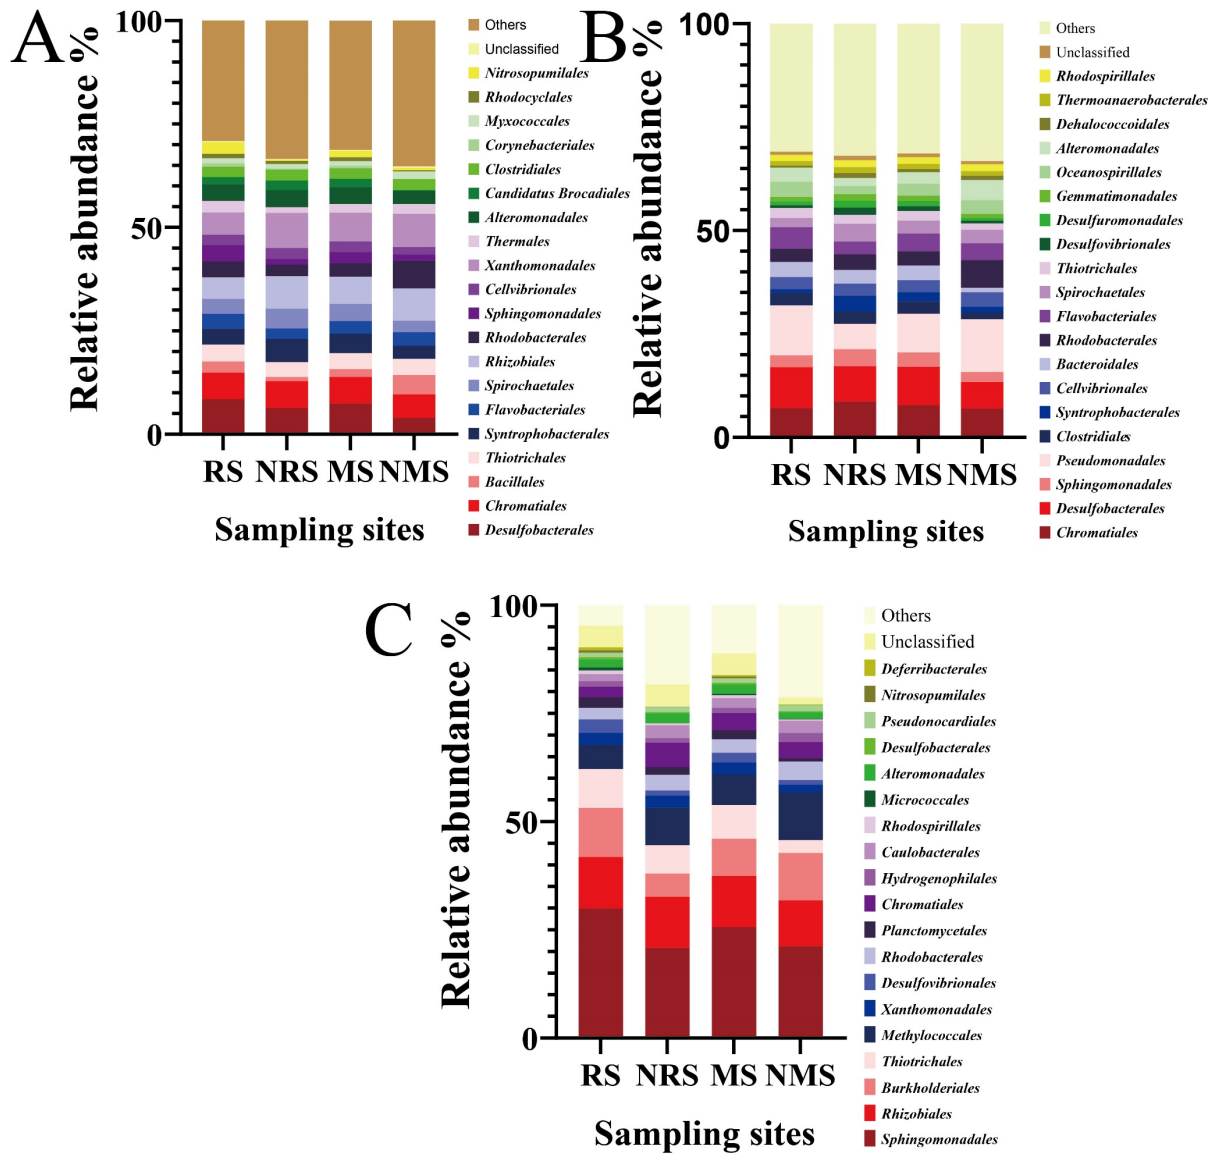

Supplement: s1 [file s1]
